# Supplementary material for: MAPK pathway mutations in head and neck cancer affect immune microenvironments and ErbB3 signaling
Source: Life Sci Alliance. 2020 May 7;3(6):e201900545. doi: 10.26508/lsa.201900545 (PMC7219112; doi:10.26508/lsa.201900545)
Supplement: Supplementary file 1 [file LSA-2019-00545_TableS1.xlsx]

## Sheet: Supplementary Table S1
Table S1: Clinicopathological correlations of MAPK pathway-mutated vs. -WT HNSCC patients (TCGA provisional). P values are shown.
		MAPK pathway Mutated (n=95)			MAPK pathway WT (n=415)			χ2 P-value	Fisher’s P-value (2-sided)
Age
	Median(range)	62 (39-90)			60 (19-88)
Sex
	Male	61	0.642105		311	0.749398		0.03372*	0.04036*
	Female	34	0.357895		104	0.250602
Ethnicity
	American Indian/Alaska native	0	0		2	0.00481928		0.208458	0.20429
	Asian	4	0.0421053		6	0.0144578
	Black or African American	6	0.0631579		41	0.0987952
	White	84	0.884211		350	0.843373
	N.A.	1	0.0105263		16	0.0385542
Disease Stage
	T0/1	5	0.0526316		42	0.101205		0.65656	0.68808
	T2	26	0.273684		111	0.26747
	T3	18	0.189474		80	0.192771
	T4/4a/4b	34	0.357895		138	0.33253
	TX	5	0.0526316		29	0.0698795
	n.a.	7	0.0736842		15	0.0361446
Drinking history
	Yes	54	0.568421		285	0.686747		0.01003*	0.01419*
	No	41	0.431579		119	0.286747
	n.a.	0	0		11	0.026506
Smoking history #
	1	22	0.231579		97	0.233735		0.45808	0.36087
	2	27	0.284211		145	0.349398
	3	17	0.178947		54	0.13012
	4	26	0.273684		109	0.262651
	5	1	0.0105263		1	0.00240964
	N.A.	2	0.0210526		9	0.0216867
Smoking& Drinking History
	Both Yes	45	0.473684		232	0.559036		0.30729	0.29502
	Both No	13	0.136842		44	0.106024
	Either No	37	0.389474		139	0.33494
HPV status
	HPV pos	10	0.105263		67	0.161446		0.15128	0.20356
	HPV neg	83	0.873684		333	0.80241
	NA	2	0.0210526		15	0.0361446
PNI
	Yes	28	0.294737		140	0.337349		0.28063	0.34735
	No	40	0.421053		153	0.368675
	N.A.	27	0.284211		122	0.293976
Adjuvant postoperative radiotherapy?
	Yes	27	0.284211		99	0.238554		0.90069	1
	No	14	0.147368		49	0.118072
	N.A.	54	0.568421		267	0.643373
Adjuvant postoperative pharmaceutical therapy?
	Yes	12	0.126316		53	0.127711		0.44223	0.57499
	No	28	0.294737		92	0.221687
	N.A.	55	0.578947		270	0.650602
Extracapsular spread pathologic
	Gross Extension	6	0.0631579		31	0.0746988		0.064	0.05936
	Microscopic Extension	7	0.0736842		70	0.168675
	No Extranodal Extension	50	0.526316		191	0.460241
	N.A.	32	0.336842		123	0.296386
Neoadjuvant Therapy Type Administered Prior To Resection Text
	Yes	1	0.0105263		9	0.0216867		0.61904	0.70062
	No	94	0.989474		406	0.978313
	N.A.	0	0		0	0
#Smoking
	Lifelong Non-smoker (less than 100 cigarettes smoked in Lifetime) = 1
	Current smoker (includes daily smokers and non-daily smokers or occasional smokers) = 2
	Current reformed smoker for > 15 years (greater than 15 years) = 3
	Current reformed smoker for ≤15 years (less than or equal to 15 years) = 4
	Current reformed smoker, duration not specified = 5
	Smoker at diagnosis = 6
	Smoking History not documented = 7
